# Supplementary material for: Selective synthesis of chlorophosphoramidites using ionic liquids
Source: Royal Society of Chemistry journal article supplement (doi:10.1039/b905000k), 2009-01-01
Supplement: b905000k.pdf [file b905000k.pdf]

## Supporting Information

**Table S1** Percentage yields (as determined by <sup>31</sup>P NMR) of the reaction of **2** with each amine as a function of the ionic liquid and ratio of PCl<sub>3</sub>:Amine:Hünigs base. This data has been used to produce Figures 1-3 in the main text.

| Ionic Liquid or Molecular Solvent         | Amine                           | Ratio (PCl <sub>3</sub> :Amine:Hünigs) | Composition (%)                             |                                                         |                                                      |                                                       |                                | Hydrolysis |
|-------------------------------------------|---------------------------------|----------------------------------------|---------------------------------------------|---------------------------------------------------------|------------------------------------------------------|-------------------------------------------------------|--------------------------------|------------|
|                                           |                                 |                                        | P(OR)(NR' <sub>2</sub> )Cl<br><b>3a/b/c</b> | P(OR) <sub>2</sub> (NR' <sub>2</sub> )<br><b>4a/b/c</b> | P(NR' <sub>2</sub> )Cl <sub>2</sub><br><b>5a/b/c</b> | P(NR' <sub>2</sub> ) <sub>2</sub> Cl<br><b>6a/b/c</b> | P(OR) <sub>3</sub><br><b>7</b> |            |
| [C <sub>4</sub> mim][NTf <sub>2</sub> ]   | <sup>i</sup> Pr <sub>2</sub> NH | 1:1:1                                  | 70                                          | 18                                                      |                                                      |                                                       | 5                              | 7          |
|                                           |                                 | 1:2:0                                  | 72                                          | 12                                                      |                                                      |                                                       | 4                              | 12         |
|                                           | Morpholine                      | 1:1:1                                  | 74                                          |                                                         | 7                                                    | 7                                                     | 3                              | 9          |
|                                           |                                 | 1:2:0                                  | 74                                          |                                                         | 7                                                    | 7                                                     |                                | 12         |
|                                           | Et <sub>2</sub> NH              | 1:1:1                                  | 77                                          | 8                                                       |                                                      | 7                                                     |                                | 8          |
|                                           |                                 | 1:2:0                                  | 82                                          | 3                                                       | 7                                                    |                                                       |                                | 8          |
| [C <sub>4</sub> dmim][NTf <sub>2</sub> ]* | <sup>i</sup> Pr <sub>2</sub> NH | 1:1:1                                  | 79                                          | 7                                                       | 10                                                   |                                                       |                                | 4          |
|                                           |                                 | 1:2:0                                  | 87                                          | 4                                                       | 7                                                    |                                                       |                                | 2          |
|                                           | Morpholine                      | 1:1:1                                  | 72                                          |                                                         |                                                      | 5                                                     |                                | 23         |
|                                           |                                 | 1:2:0                                  | 73                                          |                                                         |                                                      | 10                                                    |                                | 15         |
|                                           | Et <sub>2</sub> NH              | 1:1:1                                  | 79                                          | 11                                                      |                                                      | 5                                                     |                                | 5          |
|                                           |                                 | 1:2:0                                  | 83                                          |                                                         | 12                                                   |                                                       |                                | 5          |
| [C <sub>4</sub> mpyrr][NTf <sub>2</sub> ] | <sup>i</sup> Pr <sub>2</sub> NH | 1:1:1                                  | 52                                          | 20                                                      |                                                      |                                                       | 20                             | 8          |
|                                           |                                 | 1:2:0                                  | 84                                          | 13                                                      |                                                      |                                                       |                                | 3          |
|                                           | Morpholine                      | 1:1:1                                  | 83                                          |                                                         | 3                                                    | 3                                                     |                                | 9          |
|                                           |                                 | 1:2:0                                  | 89                                          |                                                         |                                                      | 4                                                     |                                | 7          |
|                                           | Et <sub>2</sub> NH              | 1:1:1                                  | 65                                          | 10                                                      |                                                      | 5                                                     |                                | 20         |
|                                           |                                 | 1:2:0                                  | 85                                          | 8                                                       | 4                                                    |                                                       |                                | 3          |
| [C <sub>4</sub> mpip][NTf <sub>2</sub> ]  | <sup>i</sup> Pr <sub>2</sub> NH | 1:1:1 <sup>†</sup>                     | 61                                          |                                                         | 5                                                    |                                                       |                                | 12         |
|                                           |                                 | 1:2:0                                  | 75                                          | 11                                                      | 6                                                    |                                                       |                                | 8          |
|                                           | Morpholine                      | 1:1:1                                  | 46                                          |                                                         |                                                      | 9                                                     | 23                             | 22         |
|                                           |                                 | 1:2:0                                  | 66                                          |                                                         |                                                      | 15                                                    |                                | 19         |
|                                           | Et <sub>2</sub> NH              | 1:1:1                                  | 87                                          | 7                                                       |                                                      | 6                                                     |                                |            |
|                                           |                                 | 1:2:0                                  | 75                                          |                                                         | 15                                                   |                                                       |                                | 10         |
| [C <sub>4</sub> py][NTf <sub>2</sub> ]    | <sup>i</sup> Pr <sub>2</sub> NH | 1:1:1                                  | 75                                          | 15                                                      | 3                                                    |                                                       |                                | 7          |
|                                           |                                 | 1:2:0                                  | 82                                          | 10                                                      | 4                                                    |                                                       |                                | 4          |
|                                           | Morpholine                      | 1:1:1                                  | 61                                          |                                                         | 17                                                   | 14                                                    |                                | 8          |
|                                           |                                 | 1:2:0                                  | 80                                          |                                                         | 8                                                    | 8                                                     |                                | 4          |
|                                           | Et <sub>2</sub> NH              | 1:1:1                                  | 83                                          | 10                                                      |                                                      | 5                                                     |                                | 2          |
|                                           |                                 | 1:2:0                                  | 83                                          | 3                                                       | 13                                                   |                                                       |                                | 1          |

\*Remainder made up from **2** 22%.

**Table S2**  $^{31}\text{P}$ -NMR data for all compounds observed. Ionic liquid samples were transferred directly into the NMR tube with no addition of deuterated solvents. The  $^{31}\text{P}$ -NMR chemical shifts were recorded in parts per million (ppm) relative to an external probe (sealed capillary inside the NMR tube sample) of triethylphosphonate ( $\text{PO}(\text{OEt})_3$ ) in  $\text{CDCl}_3$  (solvent used for locking/shimming optimisation). Literature data is shown in parentheses.

|                                                  | $^1\text{Pr}_2\text{NH}$ (a) | Morpholine (b)          | $\text{Et}_2\text{NH}$ (c) |
|--------------------------------------------------|------------------------------|-------------------------|----------------------------|
| $\text{PCl}_3$                                   | 220 (219) <sup>1</sup>       |                         |                            |
| $\text{P}(\text{OR})\text{Cl}_2$ (1)             | 179 (179) <sup>2</sup>       |                         |                            |
| $\text{P}(\text{OR})_2\text{Cl}$ (2)             | 164 (165) <sup>2</sup>       |                         |                            |
| $\text{P}(\text{OR})_3$ (7)                      | 139 (139) <sup>2</sup>       |                         |                            |
| $\text{P}(\text{OR})(\text{NR}'_2)\text{Cl}$ (3) | 181 (179) <sup>3</sup>       | 169 (168) <sup>3</sup>  | 176 (176) <sup>4</sup>     |
| $\text{P}(\text{OR})_2(\text{NR}'_2)$ (4)        | 148 (150) <sup>5</sup>       | Not observed            | 147 <sup>6</sup>           |
| $\text{P}(\text{NR}'_2)\text{Cl}_2$ (5)          | 170 (170) <sup>7</sup>       | 158 (156) <sup>8</sup>  | 163 (162) <sup>9</sup>     |
| $\text{P}(\text{NR}'_2)_2\text{Cl}$ (6)          | 162 (140) <sup>10</sup>      | 150 (145) <sup>11</sup> | 159 (154) <sup>12</sup>    |

<sup>1</sup> *CRC Handbook of Phosphorus-31 Nuclear Magnetic Resonance Data*, J. C. Tebby, 1991, CRC Press.

<sup>2</sup> P. R. J. Gaffney, C. B. Reese., *Bioorg. Med. Chem. Lett.*, 1997, **7**, 24, 3171-3176

<sup>3</sup> N. D. Sinha, J. Biernat, H. Koster, *Tetrahedron Lett.*, 1983, **24**, 52, 5843-5846.

<sup>4</sup> D. Gasparutto, D. Molko, R. Téoule, *Nucleosides and Nucleotides*, 1990, **9**, 1087-1098

<sup>5</sup> E. Uhlmann, J. Engers., *Tetrahedron Lett.*, 1986, **27**, 9, 1023-1026

<sup>6</sup> No literature data.

<sup>7</sup> C. Monti, C. Gennari, R. M. Steele, U. Piarulli, *Eur. J. Org. Chem.*, 2004, 3557-3565

<sup>8</sup> T. Shimidzu, K. Yamana, S. Maikuma, *Tetrahedron Lett.*, 1984, **25**, 38, 4237-4240.

<sup>9</sup> I. Bonnaventure, A. B. Charette, *J. Org. Chem.*, 2008, **73**, 16, 6330-6340.

<sup>10</sup> J. Fawcett, M. J. Hanton, R. D. W. Kemmitt, R. Padda, N. Singh, *Dalton Trans.*, 2003, 104-113.

<sup>11</sup> M. V. Shevchenko, V. P. Kukhar, *J. Gen. Chem. USSR (Engl. Transl.)*, 1984, **54**, 7, 1336-1340.

<sup>12</sup> D. J. Dellinger, D. M. Sheehan, N. K. Christensen, J. G. Lindberg, M. H. Caruthers, *J. Am. Chem. Soc.*, 2003, **125**, 4, 940-950.
